# Supplementary material for: Metasurface-assisted massive backscatter wireless communication with commodity Wi-Fi signals
Source: Springer Nature journal article supplement (doi:10.1038/s41467-020-17808-y), 2020-08-06
Supplement: 41467_2020_17808_MOESM3_ESM.pdf [file 41467_2020_17808_MOESM3_ESM.pdf]

## Description of Additional Supplementary Files

File name: Supplementary Movie 1

Description: Experimental results of our MBWC demo system
